# Supplementary material
Source: PubMed Central journal article supplement (PMC6624814)
Supplement: jamaoncol-5-1276-s003.pdf [file jamaoncol-5-1276-s003.pdf]

## Data Sharing Statement

Theelen. Effect of Pembrolizumab After Stereotactic Body Radiotherapy vs Pembrolizumab Alone on Tumor Response in Patients With Advanced Non-Small Cell Lung Cancer. *JAMA Oncol*. Published July 11, 2019. 10.1001/jamaoncol.2019.1478

### Data

**Data available:** No

### Additional Information

**Explanation for why data not available:** All data necessary to perform statistical analysis and duplication are now provided in the manuscript and/or the available study protocol
